# Supplementary material
Source: publisher figshare collection journal article supplement (https://sage.figshare.com/ndownloader/files/14507450)
Supplement: Supplementary file 1 [file 14507450]

**Supplemental Appendix Table 1.** Hazard Ratios for the effect of dropout on incident pregnancy among young women aged 13-23, enrolled in HPTN 068 from 2011–2015 excluding girls who are pregnant at baseline or first visit (N=2105)

|                             | Unweighted |             | Weighted |             |
|-----------------------------|------------|-------------|----------|-------------|
|                             | HR         | 95% CI      | HR       | 95% CI      |
| <b>Dropout on pregnancy</b> |            |             |          |             |
| Total                       |            |             |          |             |
| Dropout                     | 7.17       | 3.80, 13.52 | 5.26     | 2.72, 10.18 |
| No dropout                  | 1          | 1           | 1        | 1           |
| Low attendance              | 4.91       | 2.97, 8.11  | 3.92     | 2.34, 6.57  |
| High attendance             | 1          | 1           | 1        | 1           |

Abbreviations: CI, robust confidence intervals; HR, hazard ratio

<sup>a</sup> Weighted models conditioned on the following covariates: age at baseline, alcohol use, baseline depression, having any partner 5 years or older, wealth, intervention assignment, orphan status, prior pregnancy at baseline
